# Supplementary material for: Yield, Essential Oil and Quality Performances of Artemisia dracunculus, Hyssopus officinalis and Lavandula angustifolia as Affected by Arbuscular Mycorrhizal Fungi under Organic Management
Source: PubMed Central journal article supplement (PMC7154847; doi:10.3390/plants9030375), 2020-03-18
Supplement: plants-09-00375-s001.pdf [file plants-09-00375-s001.pdf]

## Supplements

**Table 1.** Essential oil composition of *Lavandula angustifolia* Mill. cultivar Record inoculated and non-inoculated with AMF.

| Compound                | Time (min) | Control (%) | AMF (%) |
|-------------------------|------------|-------------|---------|
| $\alpha$ -Thujene       | 6.54       | 0.04        | -       |
| $\alpha$ -Pinene        | 6.77       | 0.08        | -       |
| Camphene                | 7.19       | 0.09        | -       |
| 1-Octen-3-ol            | 7.60       | 0.41        | 0.35    |
| Sabinene                | 7.67       | 0.13        |         |
| $\beta$ -Myrcene        | 7.95       | 0.85        | 0.45    |
| Hexyl acetate           | 8.38       | -           | 0.03    |
| $\alpha$ -Phellandrene  | 8.53       | 0.11        | -       |
| 3-Carene                | 8.68       | 0.76        | 0.29    |
| m-Cymene                | 8.85       | 0.05        | -       |
| p-Cymene                | 9.00       | 0.16        | 0.12    |
| trans- $\beta$ -Ocimene | 9.19       | -           | 3.32    |
| Limonene                | 9.20       | 3.10        | -       |
| Eucalyptol              | 9.27       | 8.41        | 3.62    |
| (Z)-Ocimene             | 9.53       | 0.65        | 0.69    |
| $\gamma$ -Terpinene     | 10.01      | 0.11        | 0.09    |
| cis-Sabinene hydrate    | 10.32      | 0.29        | 0.21    |
| $\alpha$ - Terpinolen   | 10.90      | 0.12        | 0.09    |
| Linalool                | 11.16      | 34.56       | 36.46   |
| 1-Octen-1-ol, acetate   | 11.24      | 0.49        | 0.51    |
| cis-p-Menth-2-en-1-ol   | 12.02      | 0.15        | 0.11    |
| (-)-Camphor             | 12.76      | 0.23        | 0.21    |
| Lavandulol              | 13.19      | 0.42        | 0.40    |
| $\delta$ -Terpineol     | 13.44      | 0.08        | 0.06    |
| endo-Borneol            | 13.58      | 2.62        | 1.80    |
| p-Cymen-8-ol            | 13.72      | 0.03        | -       |
| Terpinen-4-ol           | 13.85      | 6.72        | 8.69    |
| Cryptone                | 13.98      | 0.96        | 0.72    |
| $\alpha$ -Terpineol     | 14.26      | 3.48        | 3.46    |
| trans-Piperitol         | 14.74      | 0.13        | 0.07    |
| Nerol                   | 15.17      | 0.35        | 0.43    |

|                        |       |       |       |
|------------------------|-------|-------|-------|
| Cuminal                | 15.77 | 0.41  | 0.25  |
| Linalyl acetate        | 15.96 | 18.76 | 25.22 |
| (±)-Lavandulyl acetate | 16.99 | 1.59  | 2.26  |
| Thymol                 | 17.26 | 1.54  | 0.66  |
| Carvacrol              | 17.56 | 0.08  | -     |
| Neryl acetate          | 19.35 | 0.56  | 0.65  |
| Geranyl acetate        | 19.95 | 1.44  | 1.39  |
| Santalene              | 21.63 | 0.91  | 0.38  |
| β-Caryophyllene        | 21.78 | 2.20  | 1.99  |
| α-Bergamotene          | 22.04 | 0.25  | 0.09  |
| (E)-β-Farnesene        | 22.43 | 0.91  | 0.57  |
| Germacrene D           | 23.59 | 0.75  | 0.41  |
| γ-Cadinene             | 24.51 | 0.76  | 0.41  |
| Caryophyllene oxide    | 26.57 | 0.93  | 0.67  |
| Epicubenol             | 27.45 | 0.12  | 0.10  |
| .tau.-Cadinol          | 28.12 | 2.92  | 2.73  |

---

**Table 2.** Essential oil composition of *Artemisia dracunculus* L. cultivar Izumrud inoculated or non-inoculated with AMF.

| Compound                    | Time (min) | Control (%) | AMF (%) |
|-----------------------------|------------|-------------|---------|
| 3-Hexen-1-ol, (Z)-          | 4.98       | 0.03        | 0.05    |
| $\alpha$ -Pinene            | 6.78       | 0.59        | 0.58    |
| Camphene                    | 7.17       | -           | 0.03    |
| Sabinen                     | 7.67       | 0.05        | 0.06    |
| $\beta$ -Pinene             | 7.86       | 0.08        | 0.08    |
| $\beta$ -Myrcene            | 7.94       | 0.13        | 0.11    |
| 3-Hexen-1-ol, acetate, (Z)- | 8.20       | 0.09        | 0.04    |
| (E)-Ocimene                 | 9.19       | 11.90       | 10.78   |
| (Z)-Ocimene                 | 9.53       | 6.75        | 6.16    |
| $\alpha$ - Terpinolen       | 10.89      | 0.07        | -       |
| Linalool                    | 11.08      | 0.04        | 0.06    |
| Neo-allo-ocimene            | 12.06      | 0.06        | 0.06    |
| Methyl chavicol             | 14.45      | 79.34       | 81.06   |
| Citronellol                 | 15.16      | 0.04        | -       |
| Carvone                     | 15.82      | -           | 0.14    |
| Bornyl acetate              | 17.19      | 0.11        | 0.02    |
| Methyleugenol               | 20.63      | 0.52        | 0.57    |
| Germacrene D                | 23.59      | -           | 0.04    |
| Bicyclogermacren            | 24.05      | 0.20        | 0.16    |

**Table 3.** Essential oil composition of *Hyssopus officinalis* cultivar Nikitsky bely inoculated and non-inoculated with AMF.

| Compound                           | Time, min | Control, % | AMF, % |
|------------------------------------|-----------|------------|--------|
| $\alpha$ -Thujene                  | 6.55      | -          | 0.03   |
| $\alpha$ -Pinene                   | 6.79      | 0.06       | 0.09   |
| Sabinene                           | 7.68      | 0.42       | 0.35   |
| $\beta$ -Pinene                    | 7.88      | 2.30       | 2.73   |
| $\beta$ -Myrcene                   | 7.96      | 0.28       | tr     |
| Limonene                           | 9.20      | 0.36       | 0.28   |
| Eucalyptol + $\beta$ -Phellandrene | 9.28      | 0.49       | 0.18   |
| (Z)-Ocimene                        | 9.54      | 0.24       | 0.16   |
| cis-Sabinene hydrate               | 10.32     | 0.10       | 0.07   |
| Linalool                           | 11.10     | 0.57       | 0.82   |
| Nonanal                            | 11.18     | tr         | 0.16   |
| $\beta$ -Thujone                   | 11.80     | 0.33       | 0.30   |
| trans-Pinocarveol                  | 12.66     | 0.14       | 0.29   |
| (E)-Pinocamphone                   | 13.28     | 52.78      | 50.43  |
| Isopinocamphone                    | 13.75     | 25.99      | 26.28  |
| Myrtenol                           | 14.41     | 3.49       | 3.96   |
| -                                  | 15.96     |            | 0.15   |
| Methyl myrtenate                   | 17.49     | 0.49       | 0.49   |
| Carvacrol                          | 17.55     |            | tr     |
| -                                  | 18.39     | 0.07       | 0.05   |
| (-)- $\beta$ -Bourbonene           | 20.65     | 0.98       | 1.54   |
| $\alpha$ -Gurjunene                | 21.42     | 0.12       | 0.13   |
| $\beta$ -Caryophyllene             | 21.78     | 0.88       | 0.78   |
| Humulene                           | 22.83     | 0.09       | 0.08   |
| Alloaromadendrene                  | 23.03     | 0.72       | 0.85   |
| Germacrene D                       | 23.59     | 1.85       | 1.50   |
| Bicyclogermacren                   | 24.05     | 2.58       | 2.10   |
| -                                  | 24.61     |            | 0.05   |
| Elemol                             | 25.41     | 2.27       | 3.04   |
| -                                  | 26.08     |            | 0.06   |
| (+)-Spathulenol                    | 26.37     | 1.20       | 1.92   |
| Caryophyllene oxide                | 26.57     | 0.45       | 0.51   |

|                     |       |      |      |
|---------------------|-------|------|------|
| -                   | 27.21 | 0.18 | 0.18 |
| $\beta$ -Eudesmol   | 28.53 | 0.08 | 0.32 |
| -                   | 28.75 | 0.28 | 0.13 |
| $\alpha$ -Bisabolol | 29.19 | 0.22 | -    |

---
